# Supplementary material
Source: Research Square preprint supplement (doi:10.21203/rs.3.rs-9829223/v1)
Supplement: Supplementary file 1 [file baa42e93fc999e808370dbb3.docx]

# NeurIPS Paper Checklist

## Claims

Answer: [Yes]

Justification: The abstract and introduction clearly state the contribution (RAG improves F0.5 over zero-shot on one VCBench fold) and its limitations (single fold, small LLM, modest absolute gains).

## Limitations

Answer: [Yes]

Justification: Section 6 enumerates limitations including single-fold evaluation, small LLM, lack of statistical significance testing, and prompt sensitivity.

## Theory assumptions and proofs

Answer: [N/A]

Justification: This paper presents no theoretical results.

## Experimental result reproducibility

Answer: [Yes]

Justification: All code, parameters (random seed 42, *k*=3, model names), and JSON artefacts are provided in the public GitHub repository. The pipeline runs with a single command: python run_phase1.py.

## Open access to data and code

Answer: [Yes]

Justification: Code available at <https://github.com/GilDark012/vcbench_rag>. The VCBench dataset is publicly available at <https://arxiv.org/abs/2509.14448>.

## Experimental setting/details

Answer: [Yes]

Justification: Section 4.1 specifies the hardware, LLM, embedding model, random seed, train/test split, and evaluation metric.

## Experiment statistical significance

Answer: [No]

Justification: With 81 positives in the test set and a delta of 1 TP, formal significance tests are not informative at this scale. This limitation is acknowledged in Section 6.

## Experiments compute resources

Answer: [Yes]

Justification: Section 4.1 states all experiments run on a standard consumer laptop (Win- dows 11, CPU only) with no GPU.

## Code of ethics

Answer: [Yes]

Justification: The research uses anonymised profiles and does not attempt to re-identify individuals. Predictions are for research purposes only.

## Broader impacts

Answer: [Yes]

Justification: Automated founder scoring could introduce bias against underrepresented groups if profiles systematically differ across demographics. Future deployment should include fairness audits.

## Safeguards

Answer: [N/A]

Justification: No pre-trained generative model or scraped dataset is released.

## Licenses for existing assets

Answer: [Yes]

Justification: VCBench is cited ([1](#_bookmark3)). ChromaDB ([https://github.com/chroma-core/](https://github.com/chroma-core/chroma) [chroma](https://github.com/chroma-core/chroma), Apache 2.0) and Ollama (<https://github.com/ollama/ollama>, MIT) are

open-source. nomic-embed-text and qwen2.5:7b are publicly available under their respective licenses.

## New assets

Answer: [Yes]

Justification: The Phase 1 codebase is documented in the README and released under the MIT license at <https://github.com/GilDark012/vcbench_rag>.

## Crowdsourcing and research with human subjects

Answer: [N/A]

Justification: No crowdsourcing or human subjects research was conducted.

## Institutional Review Board (IRB)

Answer: [N/A]

Justification: No human subjects research was conducted.

## Declaration of LLM usage

Answer: [Yes]

Justification: qwen2.5:7b via Ollama is a core component of the prediction pipeline, described in Sections 3.4 and 4.1.
